# Supplementary material
Source: HighWire-hosted journal article supplement (https://svn.bmj.com/content/svn-2018-000154)
Supplement: inline-supplementary-material-1 [file inline-supplementary-material-1.pdf]

## **Online Supplemental Materials**

### **List of directors of Provincial Centers of Neurological Diseases/Stroke Care Management**

**Anhui:** Kai Wang, Department of Neurology, the First Affiliated Hospital of Anhui Medical University, Hefei, Anhui, China.

**Beijing:** Xunming Ji, Department of Neurosurgery, Xuanwu Hospital, Capital Medical University, Beijing, China.

**Chongqing:** Xinyue Qin, Department of Neurology, the First Affiliated hospital of Chongqing Medical University, Chongqing, China.

**Fujian:** Ning Wang, Department of Neurology and Institute of Neurology, First Affiliated Hospital, Fujian Medical University, Fuzhou, Fujian, China.

**Gansu:** Zhaoming Ge, Department of Neurology, Lanzhou University Second Hospital, Lanzhou, Gansu, China.

**Guangdong:** Jinsheng Zeng, Department of neurology, National Key Clinical Department and Key Discipline of Neurology, the First Affiliated Hospital, Sun Yat-sen University, Guangzhou, Guangdong, China.

**Guangxi:** Lvli Li, Department of Neurology, the People's Hospital of Guangxi Zhuang Autonomous Region, Nanning, Guangxi, China.

**Guizhou:** Lan Chu, Department of Neurology, Hospital Of Guizhou Medical University, Guiyang, Guizhou, China.

**Hainan:** Zhibin Chen, Department of Neurology, the First Affiliated Hospital of Hainan Medical University, Haikou, Hainan, China.

**Hebei:** Li Guo, Department of Neurology, the Second Hospital of Hebei Medical University, Shijiazhuang, Hebei, China.

**Heilongjiang:** Guozhong Li, First Affiliated Hospital of Harbin Medical University, Harbin, Heilongjiang, China.

**Henan:** Yuming Xu, Department of Neurology, the First Affiliated Hospital of Zhengzhou University, Henan, China.

**Hubei:** Bo Hu, Department of Neurology, Union Hospital, Hua Zhong Science and Technology University, Wuhan, Hubei, China.

**Hunan:** Beisha Tang, Department of Neurology and Gerontology, Xiangya Hospital, Central South University, Changsha, Hunan, China..

**Inner Mongolia:** Guorong Liu, Department of Neurology, Baotou City Central Hospital (Inner Mongolia CVD Institute) , Baotou, Inner Mongolia, China.

**Jiangsu:** Xiaoshan Wang, Department of Neurology, Nanjing Brain Hospital, Nanjing Medical University, Nanjing, Jiangsu, China.

**Jiangxi:** Xiaomu Wu, Department of Neurology, Jiangxi Provincial People's Hospital, Nanchang, Jiangxi, China..

**Jilin:** Yi Yang, Department of Neurology, the First Hospital of Jilin University, Changchun, Jilin, China.

**Liaoning:** Zhiyi He, Department of Neurology, the First Affiliated Hospital of China Medical University, Shenyang, Liaoning, China.

**Ningxia:** Zhenhai Wang, Department of Neurology, General Hospital of Ningxia Medical University, Yinchuan, Ningxia, China.

**Qing Hai:** Shizheng Wu, Department of Neurology, Qinghai Provincial People's Hospital, Xining, Qinghai, China.

**Shaanxi:** Gang Zhao, Department of Neurology, Xijing Hospital, the Fourth Military Medical University, Xian, Shaanxi, China.

**Shandong:** Meijia Zhu, Department of Neurology, Qianfoshan Hospital, Shandong University, Jinan, Shandong, China..

**Shanghai:** Qiang Dong, Department of Neurology, Huashan Hospital, Fudan University, Shanghai, China.

**Shanxi:** Xiaoyuan Niu, Department of Neurology, First Hospital of Shanxi Medical University, Taiyuan, Shanxi, China.

**Sichuan:** Dong Zhou, Department of Neurology, West China Hospital of Sichuan University, Chengdu, Sichuan, China.

**Tianjin:** Zhongping An, Department of Neurology, Tianjin Huanhu Hospital, Tianjin, China.

**Tibet:** Yuhua Zhao, Department of Neurology, the People's Hospital of Tibetan Autonomous Region, Lhasa, Tibet, China.

**Xinjiang:** Xiaoning Zhang, Department of Neurology, the Fourth Affiliation Hospital, Xinjiang Medical University, Urumuqi, Xinjiang, China.

**Yunnan:** Li Ding, Department of Neurology, the First People's Hospital of Yunnan Province, Kunming, Yunnan, China.

**Zhejiang:** Min Lou, Department of Neurology, the Second Affiliated Hospital of Zhejiang University, School of Medicine, Hangzhou, Zhejiang, China.

Table 1. Chinese Stroke Center Alliance Data Elements

| Category                       | Example Elements                                                                                                                                                                                                                                                                                                                                                                                                                   |
|--------------------------------|------------------------------------------------------------------------------------------------------------------------------------------------------------------------------------------------------------------------------------------------------------------------------------------------------------------------------------------------------------------------------------------------------------------------------------|
| Patient demographics           | Age, gender, ethnic, insurance status, family income                                                                                                                                                                                                                                                                                                                                                                               |
| Medical history                | Hypertension, diabetes mellitus, atrial fibrillation, dyslipidemia, cervical arterial stenosis, peripheral arterial disease, prior stroke/TIA, smoking, drinking, others                                                                                                                                                                                                                                                           |
| Medication history             | Antiplatelet, anticoagulant, antihypertension, hypoglycemic drug, statin, traditional Chinese medicine                                                                                                                                                                                                                                                                                                                             |
| Hospital presentation          | Location of symptom onset, time of last seen well or symptom onset, transfer model, arrival date/time, admission date/time                                                                                                                                                                                                                                                                                                         |
| Initial neurological status    | NIHSS at arrival and admission                                                                                                                                                                                                                                                                                                                                                                                                     |
| Medications and interventions  | Intravenous thrombolysis, endovascular treatment, early antithrombotic, antithrombotic at discharge, anticoagulant for patients with atrial fibrillation, antihypertensive medications for patients with hypertension disease, hypoglycemic medications for patients with diabetes mellitus, statin therapy, deep vein thrombosis prophylaxis, dysphagia screening before any oral intake, smoking cessation, and stroke education |
| Intracerebral hemorrhage (ICH) | Digital subtraction angiography, surgical therapy                                                                                                                                                                                                                                                                                                                                                                                  |

|                               |                                                                                                                                                                                                                                                                       |
|-------------------------------|-----------------------------------------------------------------------------------------------------------------------------------------------------------------------------------------------------------------------------------------------------------------------|
| Subarachnoid hemorrhage (SAH) | Digital subtraction angiography, nimodipine description, surgical or interventional treatment, ventricular shunting therapy                                                                                                                                           |
| Lab values                    | Lipid panel, fasting plasma glucose, glycated hemoglobin, blood urea nitrogen, creatinine, homocysteinemia, uric acid, international normalized ratio                                                                                                                 |
| Complications                 | Complications include deep vein thrombosis, pneumonia, pulmonary embolism, and so on.                                                                                                                                                                                 |
| Outcomes                      | Outcomes include in-hospital cardiovascular events (ischemic stroke, hemorrhagic stroke, TIA, myocardial infarction), new-diagnosed atrial fibrillation, all-cause death, destination after discharge, length of stay at hospital, total cost during hospitalization. |

---

Table 2. Outcomes and complications

| Outcome                         | Definition                                                                                                                                                                                |
|---------------------------------|-------------------------------------------------------------------------------------------------------------------------------------------------------------------------------------------|
| All-cause death                 | In-hospital death due to any cause                                                                                                                                                        |
| Cardiovascular events           | Any event including ischemic stroke, hemorrhagic stroke, transient ischemic attack (TIA), and myocardial infarction during hospitalization                                                |
| Ischemic stroke                 | New onset of focal neurological deficit that cannot be attributed to the presenting lesion and is confirmed with radiographic (CT and/or MRI) evidence.                                   |
| Hemorrhagic stroke              | New onset of focal neurological deficit and radiographic (CT and/or MRI) findings showing hemorrhagic signs in ischemic stroke patients, haematoma expansion in patients with ICH or SAH. |
| Transient ischemic attack (TIA) | New onset of focal neurological deficit lasting less than 24 hours                                                                                                                        |
| Myocardial infarction           | Electrocardiography (ECG) or laboratory evidence of acute myocardial infarction                                                                                                           |
| Atrial fibrillation             | Intermittent or new persistent atrial fibrillation/flutter on ECG or ECG monitoring not present on admission                                                                              |
| Complication                    |                                                                                                                                                                                           |
| Deep vein thrombosis(DVT)       | Clinical diagnosis of deep vein thrombosis and with radiographic evidence                                                                                                                 |
| Pneumonia                       | Respiratory crackles, new purulent sputum, or positive sputum culture, and supported by typical chest X-ray findings                                                                      |
| Pulmonary embolism              | Clinical diagnosis of pulmonary embolism and with radiographic evidence                                                                                                                   |
| Epileptic seizure               | Clinical or electrophysiological evidence of focal or generalized seizure in previously non-epileptic patients                                                                            |
| Hydrocephalus                   | Radiographic evidence of hydrocephalous                                                                                                                                                   |

|                                               |                                                                                                                                                                                                                                                                   |
|-----------------------------------------------|-------------------------------------------------------------------------------------------------------------------------------------------------------------------------------------------------------------------------------------------------------------------|
| Urinary infection                             | Clinical symptoms of urinary tract infection combined with a positive urine examination or culture                                                                                                                                                                |
| Respiratory failure or cardiopulmonary arrest | the absence of spontaneous respiration or cardiac pulse and unresponsiveness                                                                                                                                                                                      |
| Bedsore/Decubitus ulcer                       | Any skin breaks or necrosis resulting from either pressure or trivial trauma                                                                                                                                                                                      |
| Depression                                    | Post-stroke mood disorders as mood disorders due to stroke with depressive features, major depressive-like episode, or mixed-mood features according to diagnostic criteria for depression from 5th edition Diagnostic and Statistical Manual of Mental Disorders |
| Gastrointestinal bleeding                     | Clinical (any episode of fresh blood or coffee ground emesis, hematemesis, melena, or hematochezia), laboratory or radiographic evidence of gastrointestinal bleeding.                                                                                            |

---

Table 3. Specifications of guideline-recommended performance measures

| Performance measure of ischemic stroke care               | Performance measure definition for eligible patients                                                                                                                                                                   |
|-----------------------------------------------------------|------------------------------------------------------------------------------------------------------------------------------------------------------------------------------------------------------------------------|
| Acute performance measures                                |                                                                                                                                                                                                                        |
| IV rt-PA < 4.5 Hours                                      | Intravenous recombinant tissue plasminogen activator (IV rtPA) in patients who arrive within 3.5 hours after initial symptom onset and treated within 4.5 hours                                                        |
| Endovascular treatment < 6 hours                          | Endovascular treatment means mechanical endovascular reperfusion therapy for acute ischemic stroke caused by arterial occlusion of proximal anterior circulation within 6 hours after admission                        |
| Early antithrombotics                                     | Antithrombotic therapy prescribed within 2 days of hospitalization, including antiplatelet or anticoagulant therapy                                                                                                    |
| DVT prophylaxis                                           | Patients at risk for deep vein thrombosis (DVT) (non-ambulatory) who received DVT prophylaxis by end of hospital day two, including pneumatic compression, warfarin sodium, heparin sodium, or new oral anticoagulants |
| Dysphagia screening                                       | Dysphagia screening prior to any oral intake                                                                                                                                                                           |
| Rehabilitation assessment                                 | Assessed for stroke rehabilitation services                                                                                                                                                                            |
| Performance measures at discharge                         |                                                                                                                                                                                                                        |
| Antithrombotic medication                                 | Antithrombotic therapy prescribed at discharge                                                                                                                                                                         |
| Anticoagulation for atrial fibrillation                   | Anticoagulation prescribed at discharge for patients with atrial fibrillation or atrial flutter documented during the hospitalization                                                                                  |
| Antihypertensive medicines for patients with hypertension | Antihypertension medication prescribed at discharge for patients with history of hypertension disease or hypertension disease documented during the hospitalization                                                    |



|                                                              |                                                                                                                                                                                                                                      |
|--------------------------------------------------------------|--------------------------------------------------------------------------------------------------------------------------------------------------------------------------------------------------------------------------------------|
| Hypoglycemia medication for diabetes mellitus                | Hypoglycemic medication prescribed at discharge for patients with history of diabetes mellitus or diabetes mellitus documented during the hospitalization                                                                            |
| Statin for lowering low-density lipoprotein $\geq$ 100 mg/dL | Statin prescribed at discharge if low-density lipoprotein (LDL) $\geq$ 100 mg/dL, if patient treated with lipid lowering agent prior to admission, or LDL not documented Hypoglycemia medication for diabetes mellitus               |
| Smoking cessation                                            | Smoking cessation intervention (counseling or medication) prior to discharge for current or recent smokers                                                                                                                           |
| Stroke education                                             | Stroke education provided to patient and/or caregiver, including all 5 components: modifiable risk factors, stroke warning sign and symptoms, how to activate Emergency Medical Services, need for follow-up, medications prescribed |

---

\* Eligible patients are those without any medical contraindications (e.g., treatment intolerance, excessive risk of adverse reaction, patient/family refusal, or terminal illness/comfort care only) documented as reasons for non-treatment for each of the applicable measures. Acute performance measures, except for rt-PA measure, exclude patients who died before the end of hospital day two. Performance measures at discharge exclude patients who died during hospitalization.
